# Supplementary material for: SORCS1 and SORCS3 control energy balance and orexigenic peptide production
Source: PubMed Central journal article supplement (PMC5891432; doi:10.15252/embr.201744810), 2018-02-12
Supplement: EMBR-19-e44810-s002.pdf [file EMBR-19-e44810-s002.pdf]

## Expanded View Figures

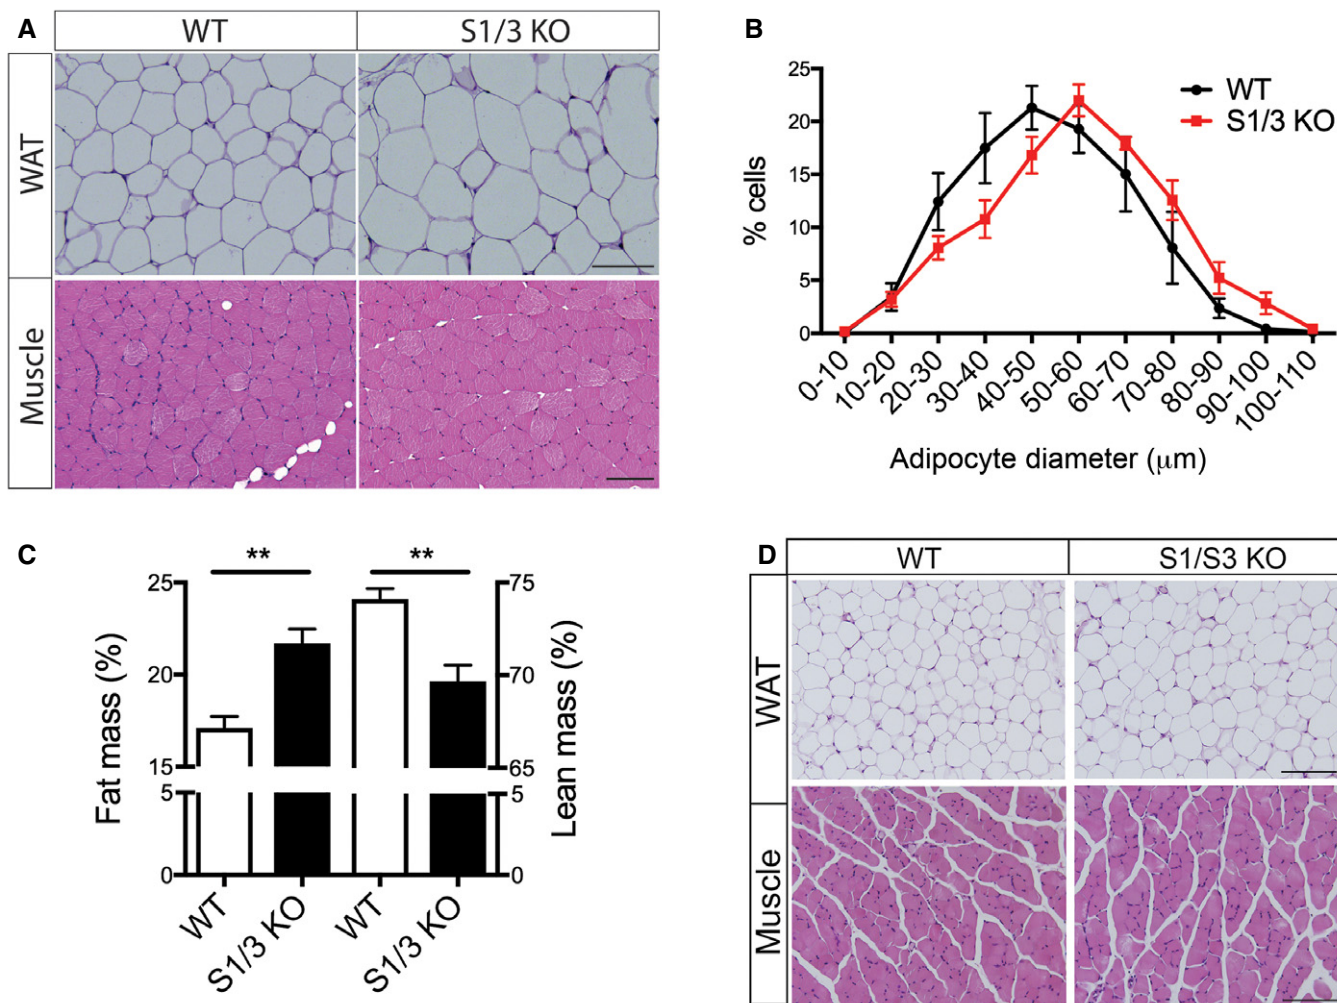

**Figure EV1. Morphology of white adipose tissue and muscle in S1/3 KO mice of different ages.**

A Representative hematoxylin and eosin (H&E)-stained sections of perigonadal white adipose tissue (WAT) and quadriceps muscle from 14- to 15-week-old WT and S1/3 KO mice. Scale bars: 100 μm.

B Adipocyte size distribution shows a decrease in the number of small cells and an increase in the number of large cells (% of total cell numbers) in perigonadal adipose tissue of S1/3 KO mice as compared to controls. For each mouse, 332–551 adipocytes across the tissue depot were analyzed on H&E-stained sections ( $n = 4–5$  mice/group). Two-way ANOVA;  $P = 0.0207$  for interaction between genotype and adipocyte size.

C Body composition as determined by NMR imaging in 6-week-old mice of the indicated genotypes. S1/3 KO mice show an increase in fat mass and a concomitant decrease in lean (fat-free) mass as compared to WT controls ( $n = 5–6$  animals/group).

D Representative H&E-stained sections of perigonadal white adipose tissue (WAT) and quadriceps muscle from 6-week-old WT and S1/3 KO mice. Scale bars: 100 μm.  $n = 3–5$  mice/genotype.

Data information: Data in (B and C) are shown as mean ± SEM and were analyzed using two-way ANOVA with Bonferroni post-test (B) or two-tailed unpaired t-test (C). \*\* $P < 0.01$ .

**Figure EV2. Impaired glucose tolerance in adult S1/3 KO mice on a normal chow.**

- A Blood glucose and insulin levels after overnight fasting in 12-week-old WT and S1/3 KO mice ( $n = 12\text{--}17$  animals/group).
- B Glucose tolerance test (GTT) in mice at 12 weeks of age. S1/3 KO mice show increased blood glucose levels after an i.p. bolus of glucose (2 g/kg body weight) as compared to WT controls ( $n = 15\text{--}17$  mice/group).
- C Area under the curve (AUC) for GTT.
- D Plasma insulin levels in mice of the indicated genotype during GTT ( $n = 9\text{--}10$  mice/group).
- E Insulin tolerance test (ITT) in mice at 13 weeks of age. Blood glucose levels after an i.p. injection of insulin (0.75 U/kg body weight) were not significantly different between the genotypes ( $n = 8\text{--}9$  mice/group).
- F Pyruvate tolerance test (PTT) in mice of the indicated genotypes at 18 weeks of age. Blood glucose levels after an i.p. injection of sodium pyruvate (1 g/kg body weight) are shown ( $n = 8\text{--}9$  mice/group).
- G Area under curve (AUC) for PTT.

Data information: Data are shown as mean  $\pm$  SEM and were analyzed using a two-tailed unpaired *t*-test (A, C, G) or two-way ANOVA with Bonferroni post-test (B, D–F). \*\* $P < 0.01$ , \*\*\* $P < 0.001$ .

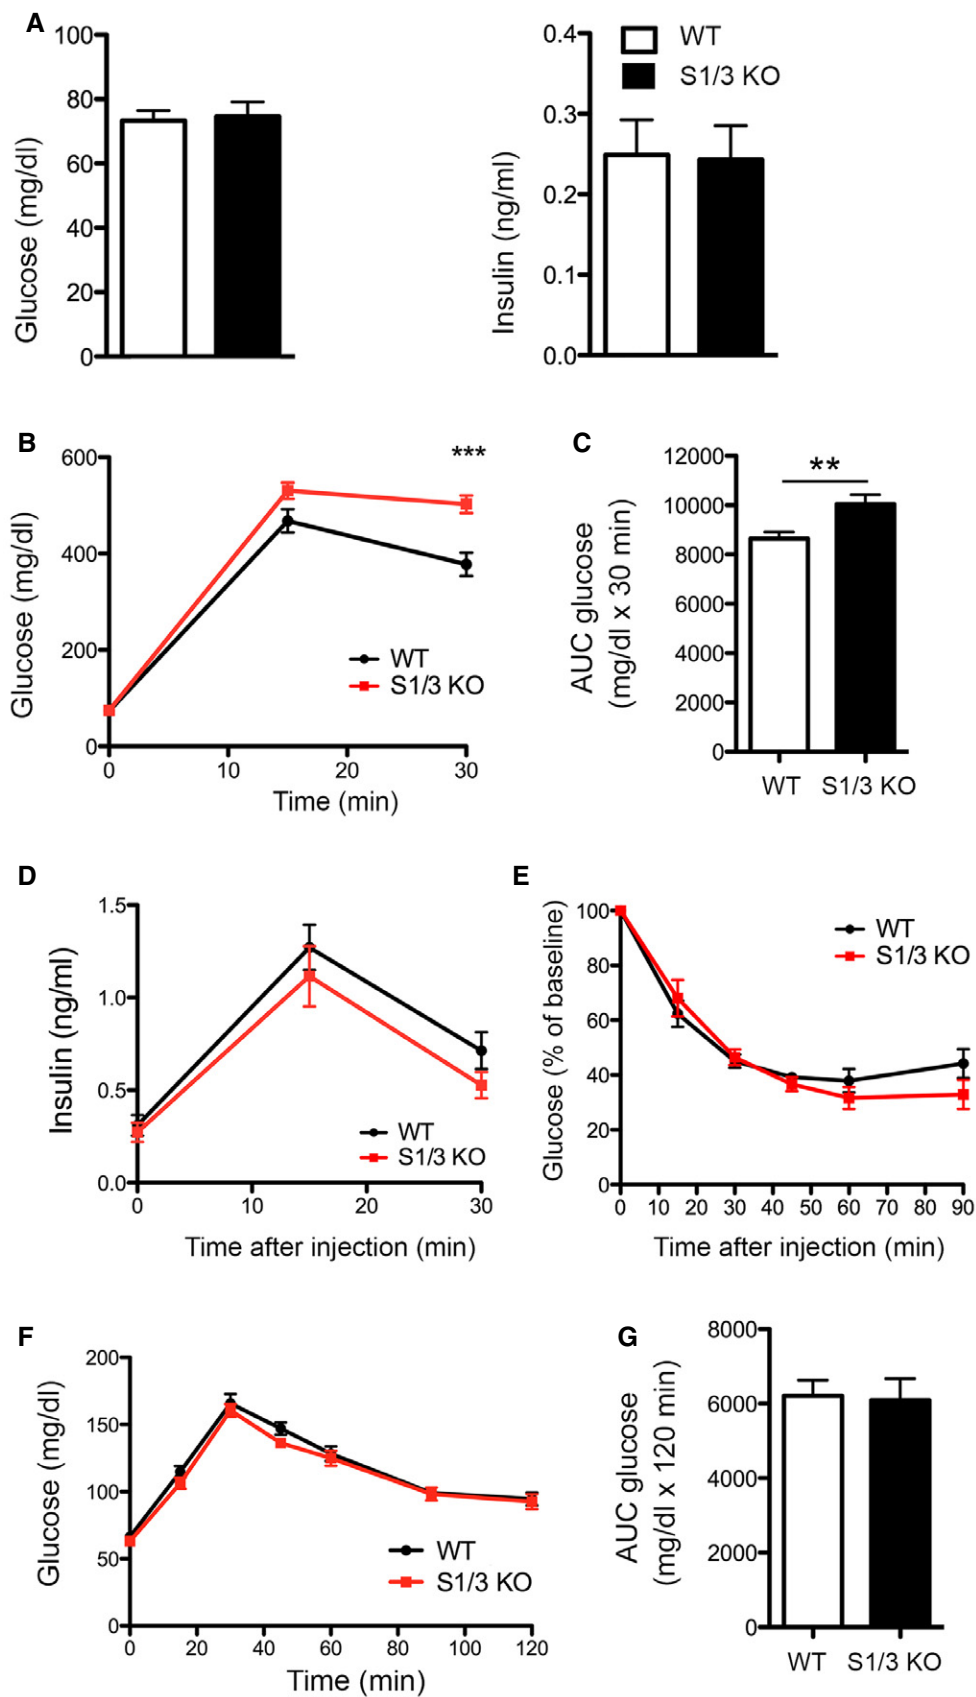

Figure EV2.

**Figure EV3. Glucose homeostasis in aged S1/3 KO mice.**

- A, B Blood glucose (A) and insulin (B) levels after overnight fasting in 9-month-old WT and S1/3 KO mice ( $n = 6-9$  animals/group).
- C Plasma insulin levels before and after an i.p. bolus of glucose (2 g/kg body weight) in 9-month-old WT and S1/3 KO mice ( $n = 6-9$  mice/group).
- D Insulin tolerance test at 9 months of age. Blood glucose levels were measured before and after an i.p. injection of insulin (0.75 U/kg body weight) ( $n = 7-9$  mice/group).
- E Glucose tolerance test (GTT) at 8 months of age. Blood glucose levels were measured before and after an i.p. bolus of glucose (2 g/kg body weight) ( $n = 6-8$  mice/group).
- F Area under curve (AUC) for GTT.

Data information: Data are shown as mean  $\pm$  SEM and were analyzed using a two-tailed unpaired  $t$ -test (A, B, F) or two-way ANOVA with Bonferroni post-test (C-E). \* $P < 0.05$ , \*\* $P < 0.01$ .

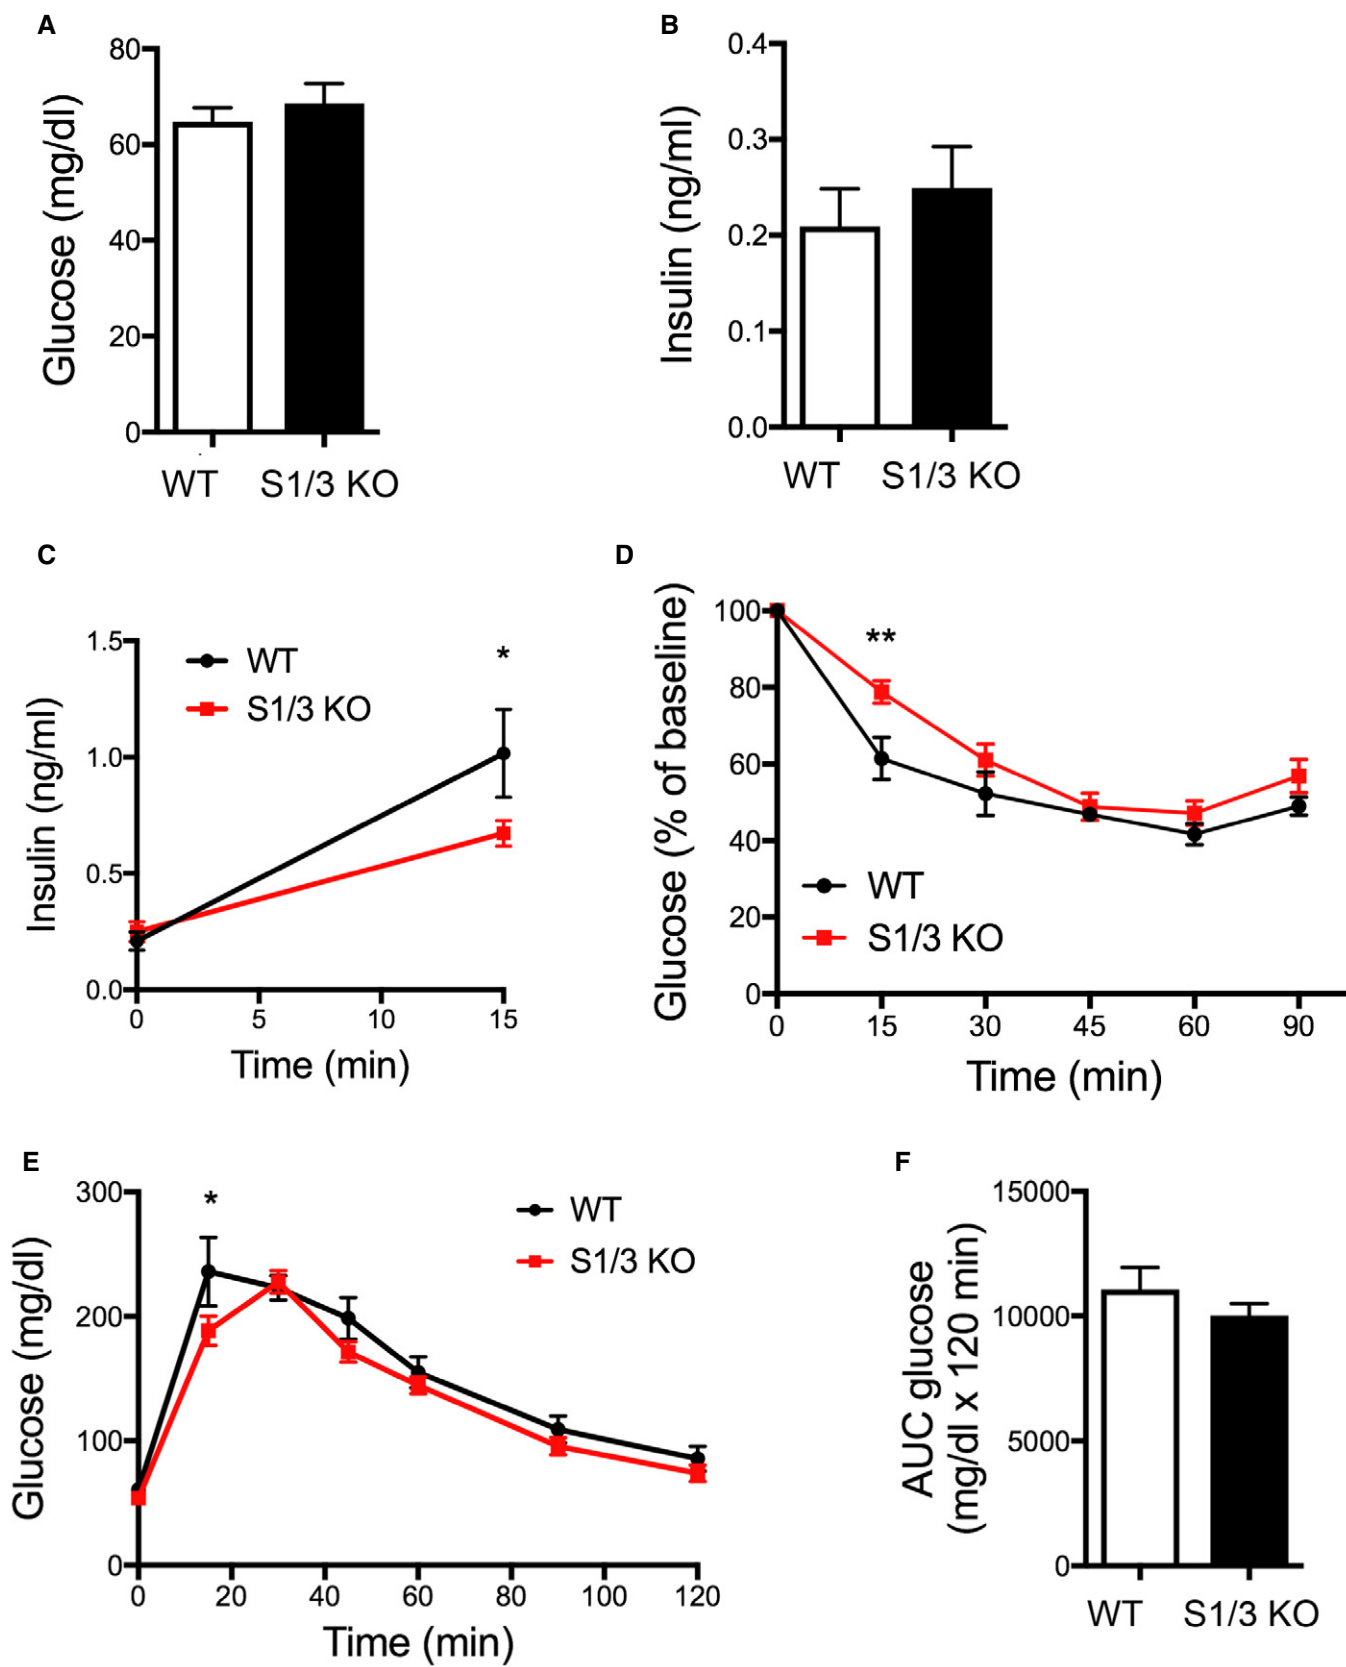

Figure EV3.

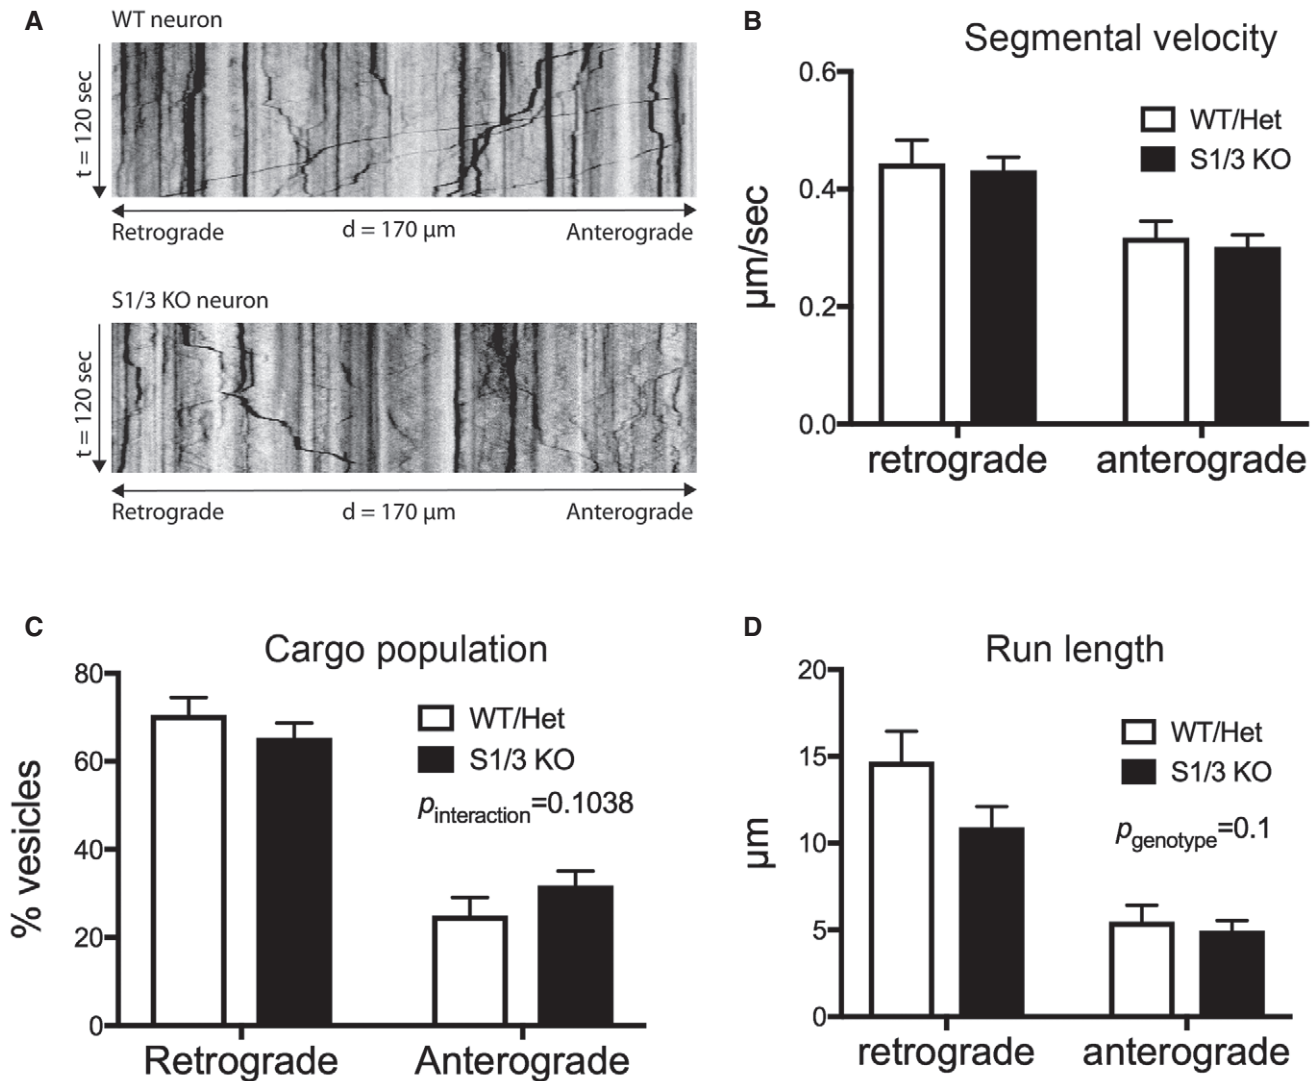

**Figure EV4. Time-lapse imaging of GFP-TrkB trafficking in primary cortical neurons from WT and S1/3 KO mice.**

- A Representative kymographs (time–space plots) generated from time-lapse movies visualizing trafficking of transiently overexpressed GFP-TrkB in DIV7 primary cortical neurons from WT and S1/3 KO mice.
- B Segmental velocity of GFP-TrkB vesicles uninterruptedly moving in retrograde or anterograde direction in axons from WT and S1/3 KO primary cortical neurons. ( $n = 15\text{--}20$  neurons/genotype from two neuronal culture preparations each).
- C Population (% of total) of GFP-TrkB vesicles moving in retrograde and anterograde directions in axons from WT and S1/3 KO primary cortical neurons ( $n = 28\text{--}29$  neurons/genotype from three neuronal culture preparations each).
- D Total distance covered by GFP-TrkB vesicles uninterruptedly moving in retrograde or anterograde directions in axons from WT and S1/3 KO primary cortical neurons. ( $n = 15\text{--}20$  neurons/genotype from two neuronal culture preparations each).

Data information: Data in (B–D) are shown as mean  $\pm$  SEM and analyzed using two-way ANOVA with Bonferroni post-test.
